# Supplementary material for: Ribosomal RNA (rRNA) sequences from 33 globally distributed mosquito species for improved metagenomics and species identification
Source: eLife journal article supplement (doi:10.7554/elife.82762), 2023-01-23
Supplement: supp [file elife-82762-supp-v1.zip]

Genus colour codes

- Aedes (Ae)
- Anopheles (An)
- Coquillettidia (Cq)
- Culex (Cx)
- Eretmapodites (Er)
- Horreolanus (Ho)
- Limatus (Li)
- Mansonia (Ma)
- Mimomyia (Mi)
- Psorophora (Ps)
- Uranotaenia (Ur)

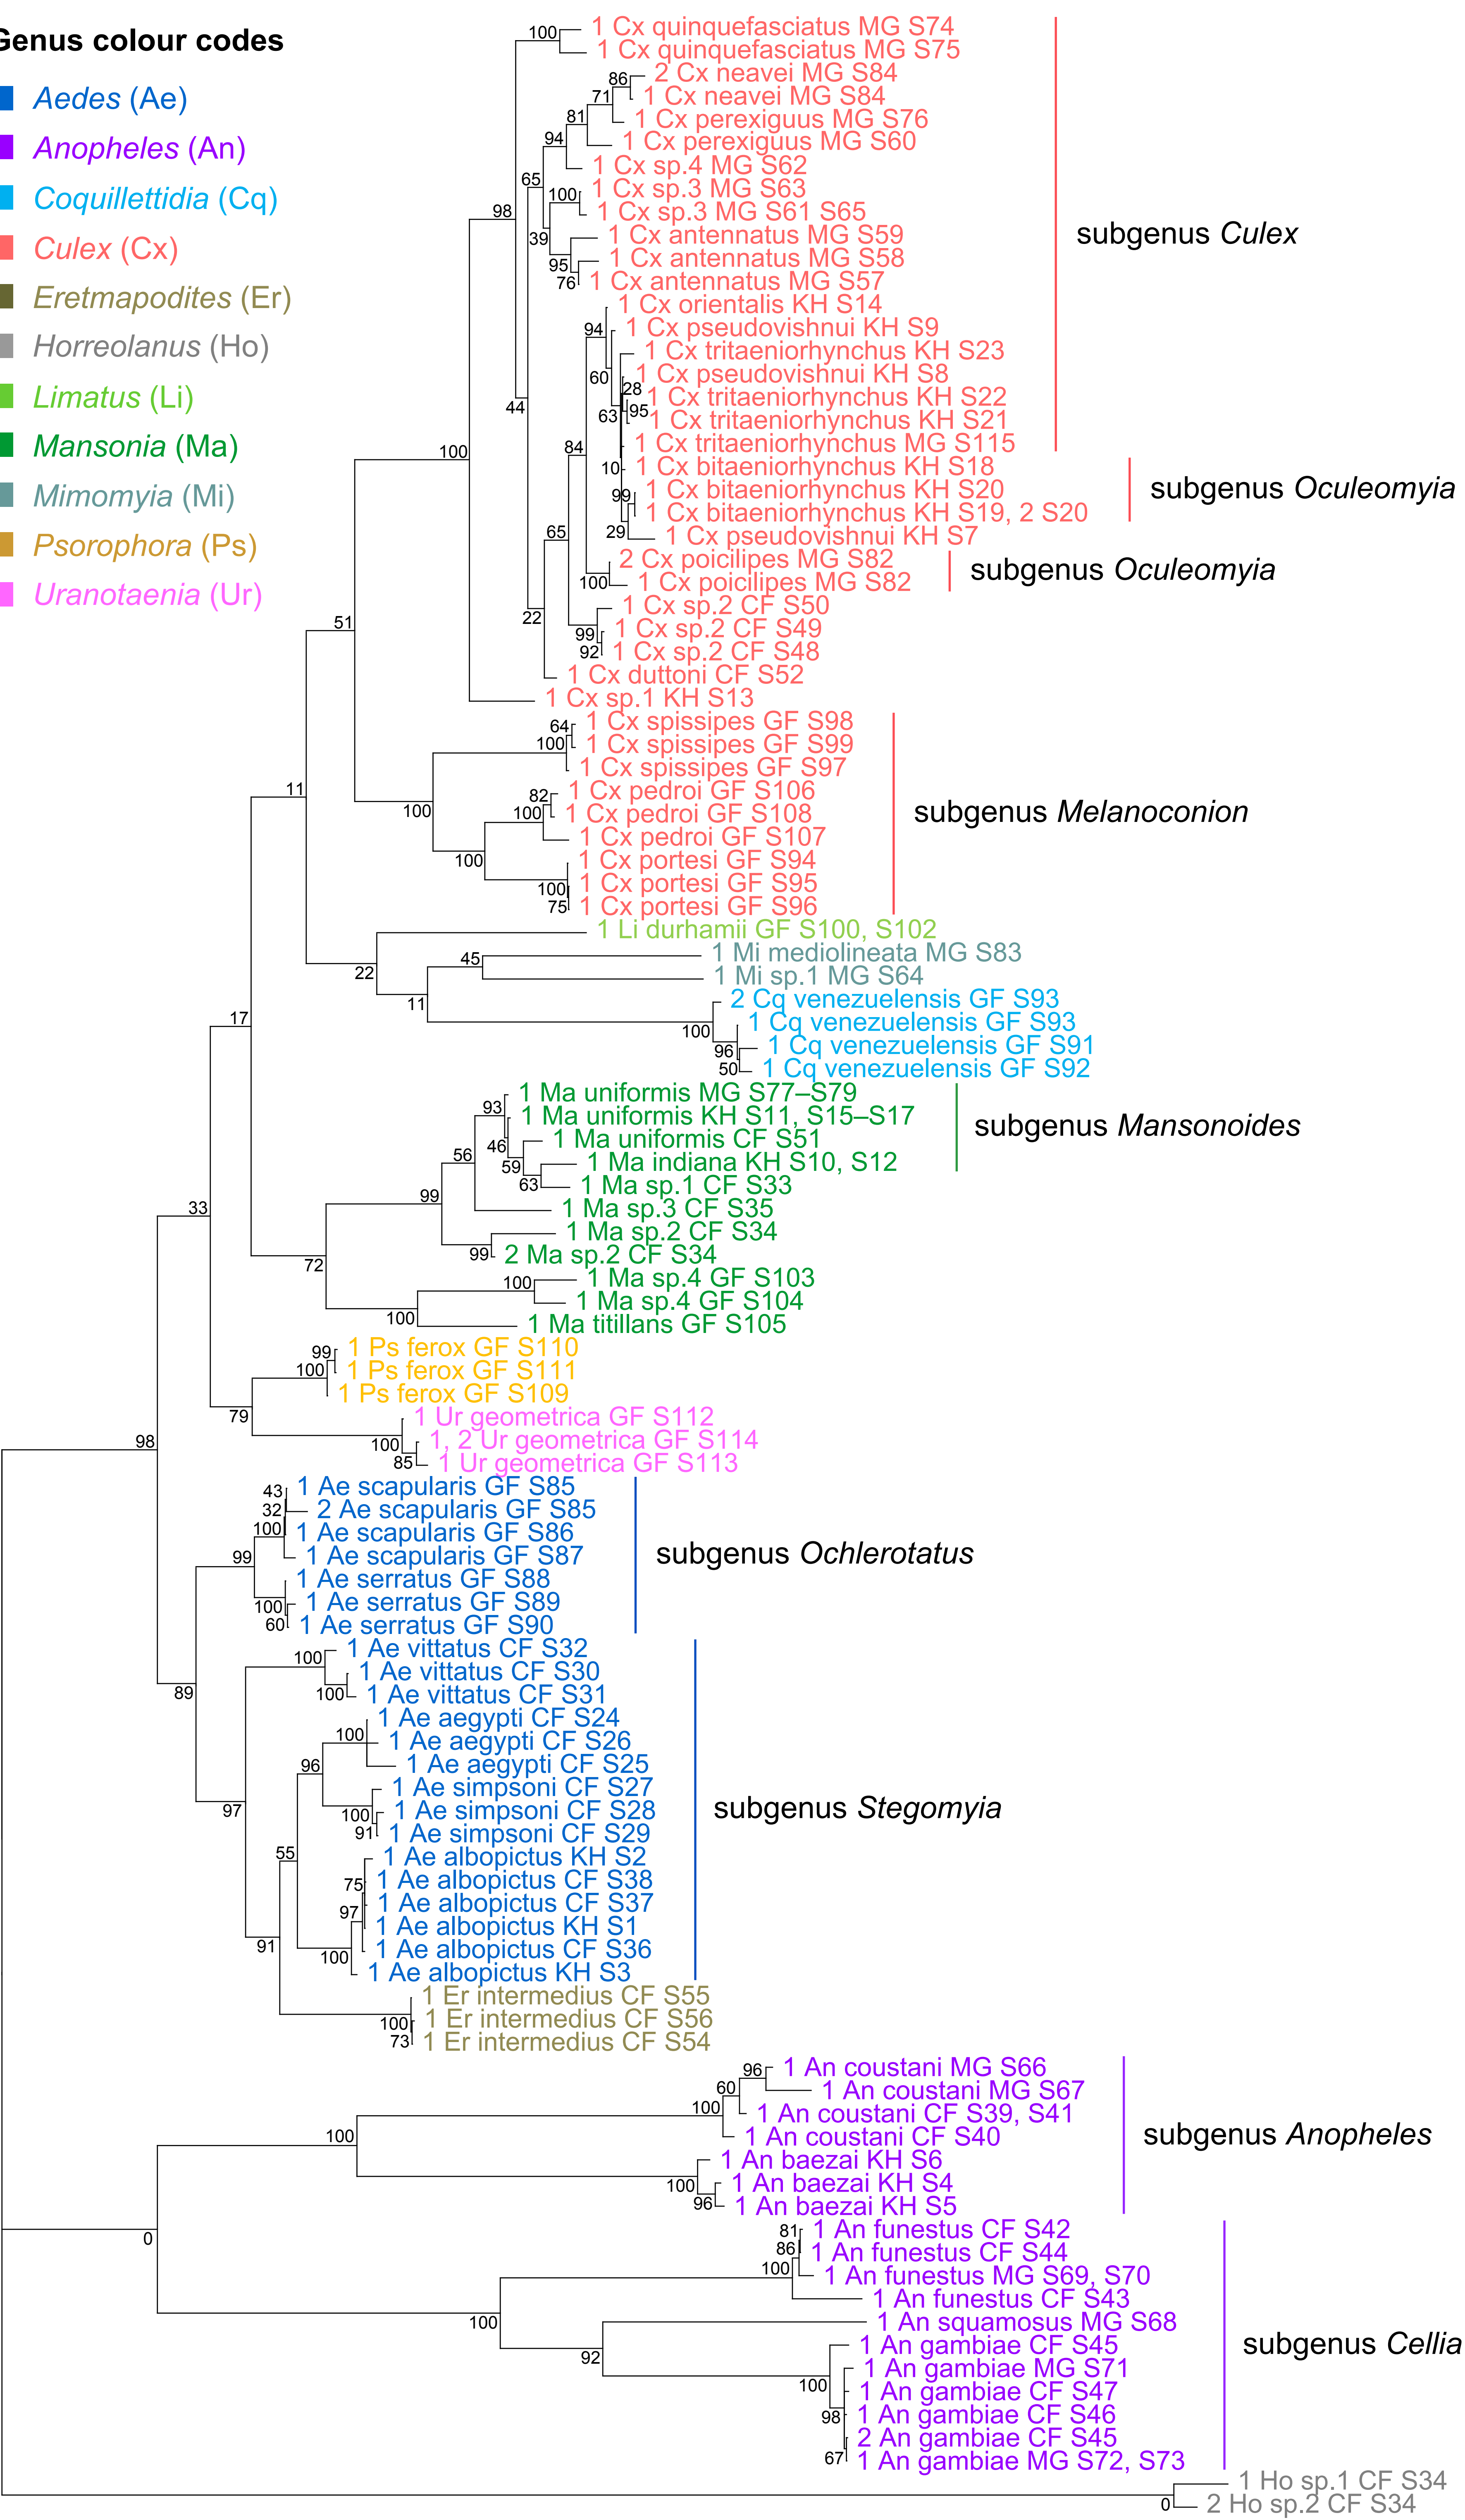

0.05
