# Supplementary material for: Ribosomal RNA (rRNA) sequences from 33 globally distributed mosquito species for improved metagenomics and species identification
Source: eLife journal article supplement (doi:10.7554/elife.82762), 2023-01-23
Supplement: supp [file elife-82762-supp-v1.zip]

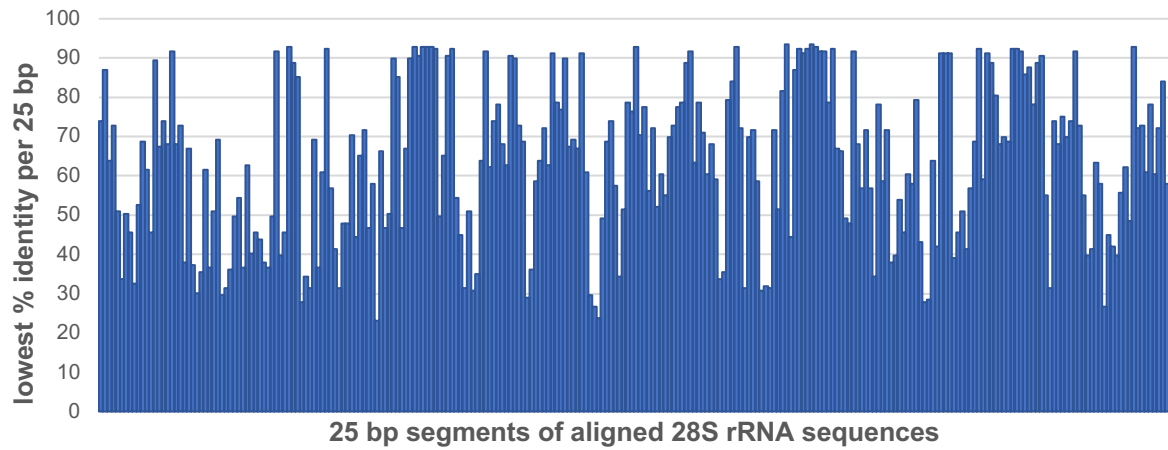

**Supplementary Figure S2.** Sequence conservation among 169 28S rRNA sequences obtained from this study and from GenBank combined. Multiple sequence alignment was performed on 28S rRNA sequences, 3900 bp in length. Each bar represents a sliding 25-bp segment of the 28S rRNA sequence alignment where the values are the lowest percentage identity found.
