# Supplementary figures and images for: Ribosomal RNA (rRNA) sequences from 33 globally distributed mosquito species for improved metagenomics and species identification
Source: eLife journal article supplement (doi:10.7554/elife.82762), 2023-01-23

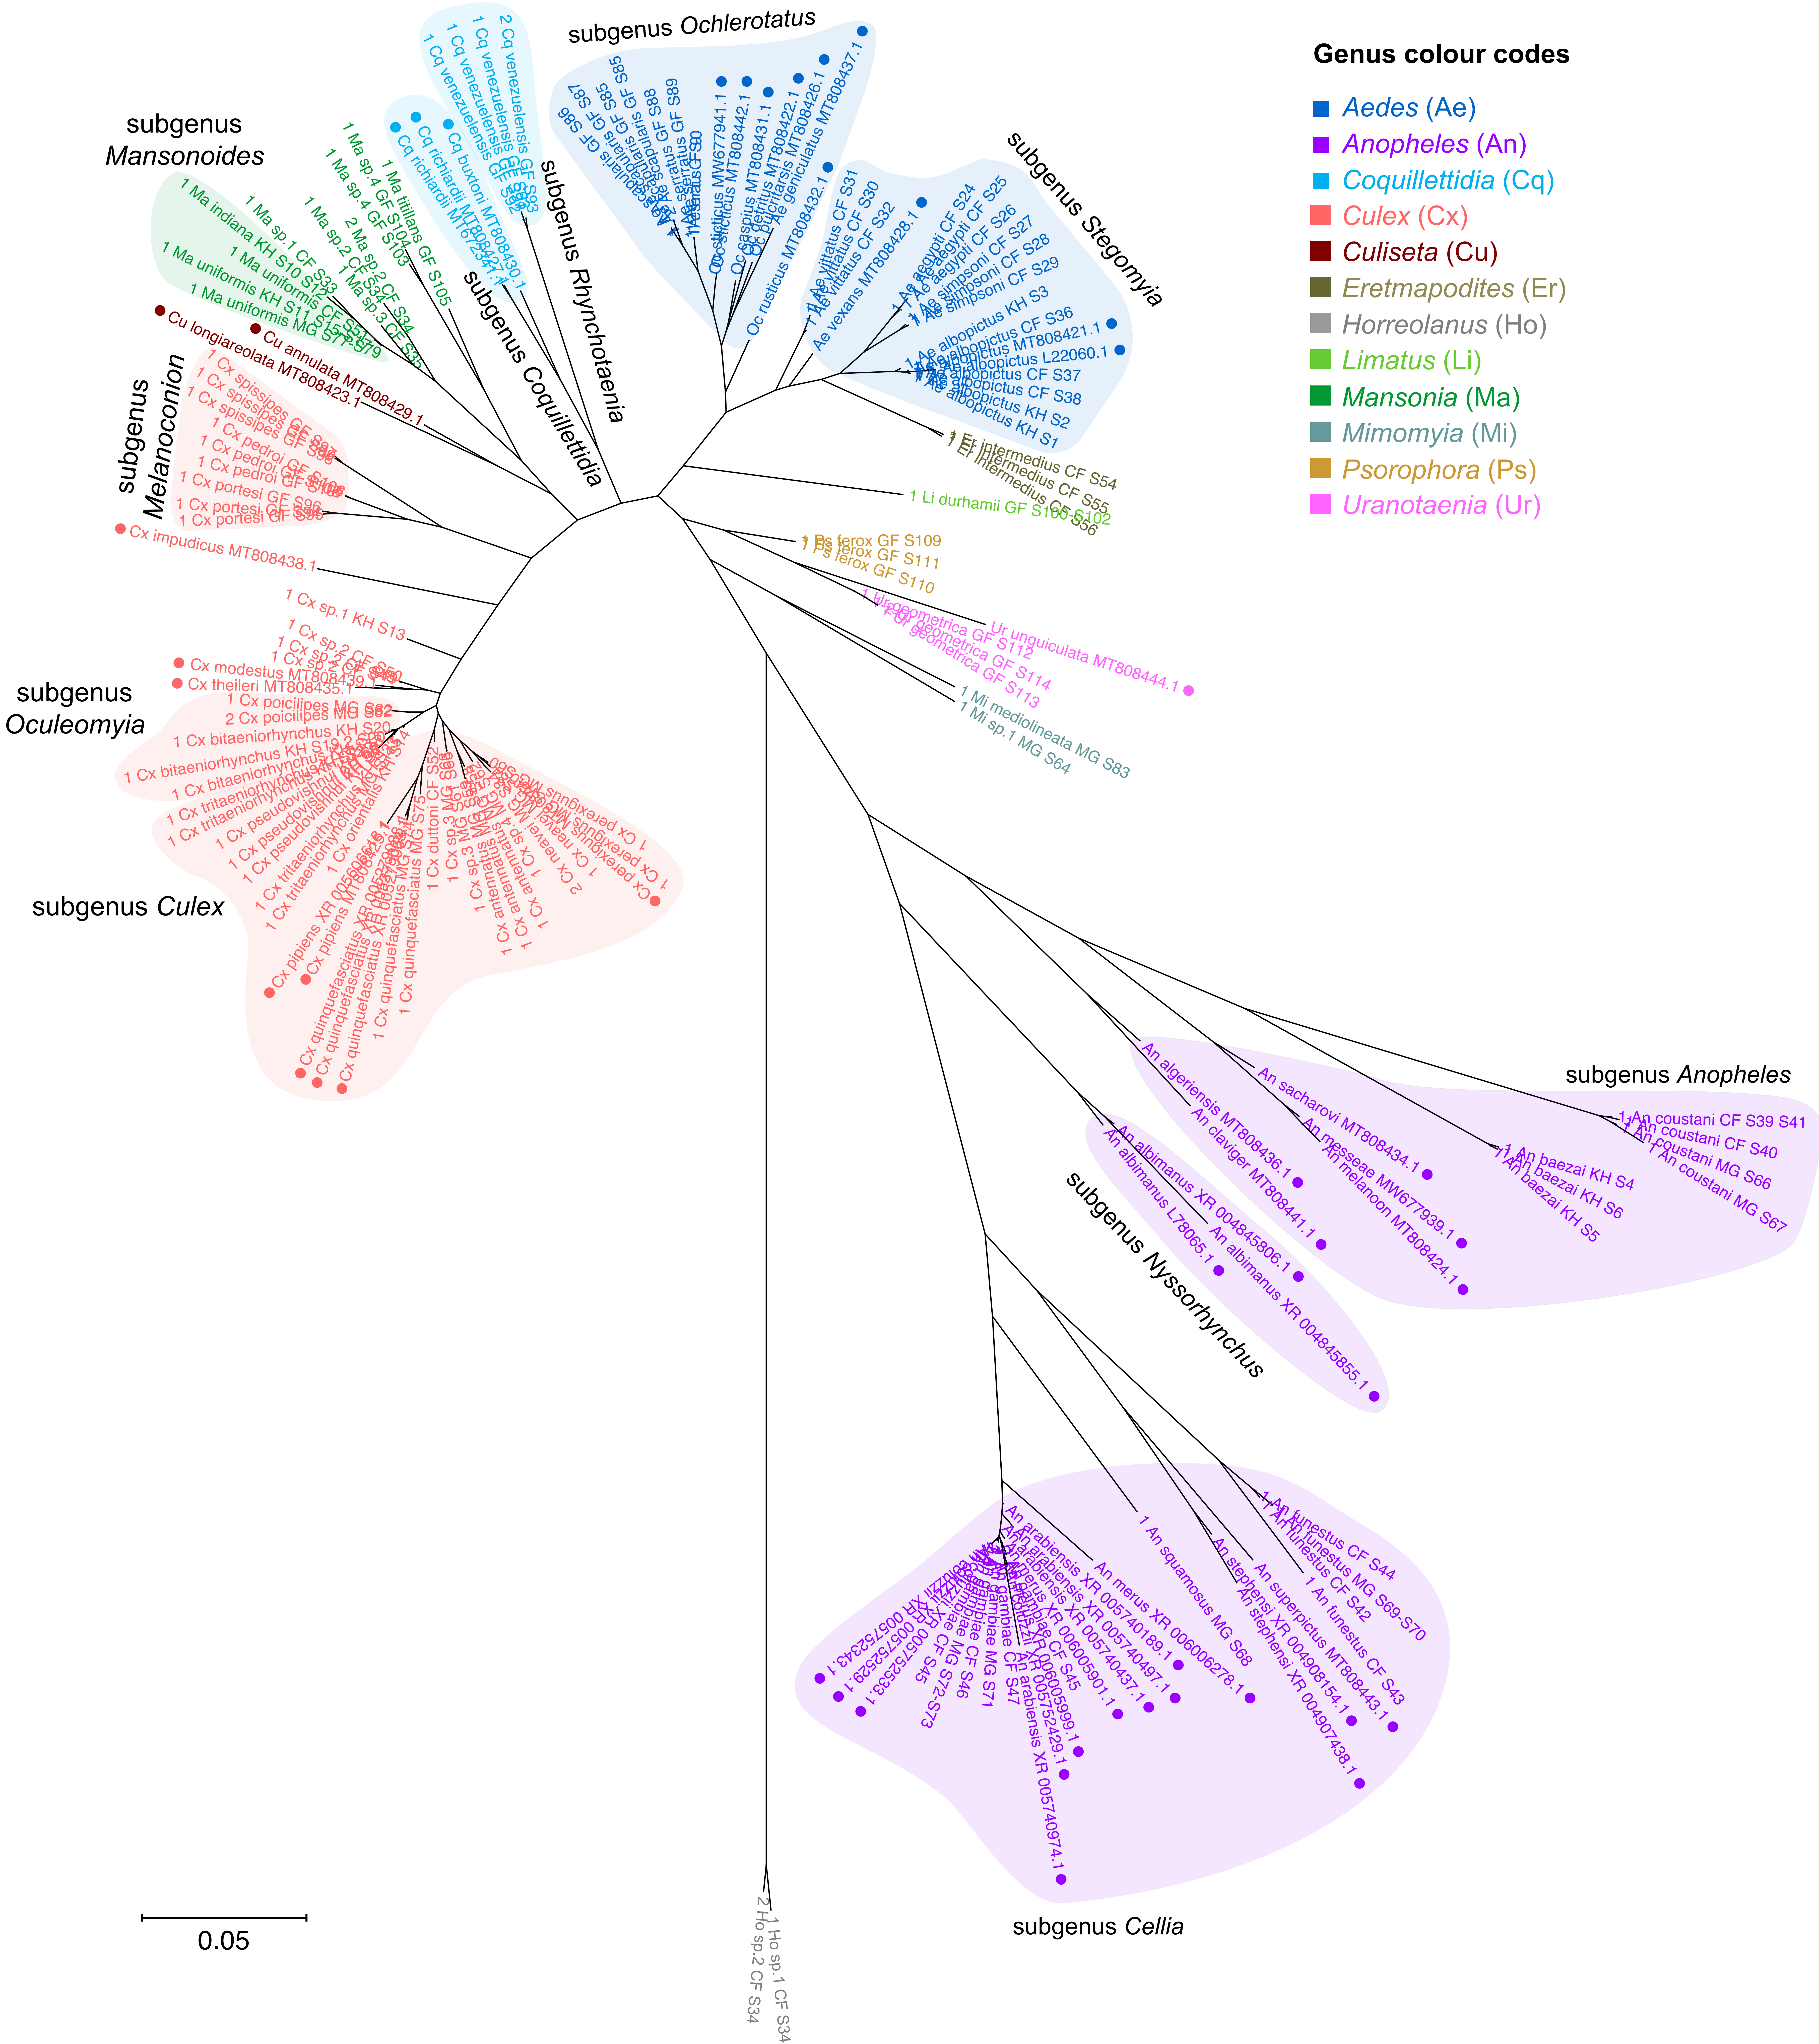

Supplement: supp [file elife-82762-supp-v1.zip]
